# Supplementary material
Source: Springer Nature journal article supplement (https://www.springermedizin.de/resource/supplementary/12984_2010_318_MOESM3_ESM.pdf/9605762)

# Force Away, Impaired Arm

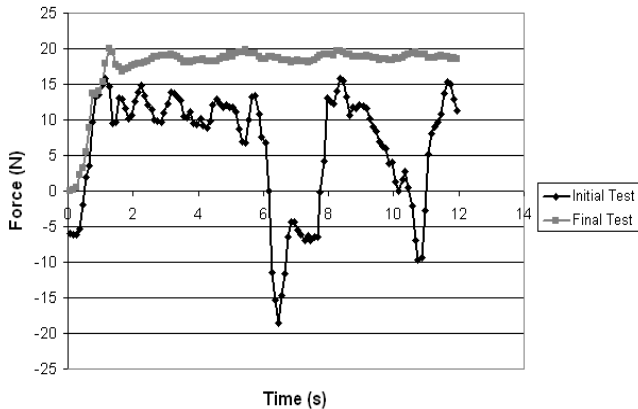

Supplement: MOESM3 [file 9605762]
